# Supplementary material for: Formability Improvement Mechanism of Local Laser Hardened Aluminium Alloy Sheet with Gradient Material Model
Source: Research Square preprint supplement (doi:10.21203/rs.3.rs-8875960/v1), 2026-02-20
Supplement: Supplementary file 1 [file 4bd55e5451bedb55ec1d7691.docx]

**Highlights**

- An accurate simulated peak temperature field of laser scanning heat treatment for Al alloy sheets was obtained.
- A high precision model for multilayer gradient differential sheet was constructed.
- The mechanism of forming ability improvement of differential sheet by gradient distribution of material parameters *k* and *n* was revealed.
- A method of predicting the fracture transfer behavior related to *k* and *n* was proposed based by multilayer gradient model.
