# Supplementary material for: Formability Improvement Mechanism of Local Laser Hardened Aluminium Alloy Sheet with Gradient Material Model
Source: Research Square preprint supplement (doi:10.21203/rs.3.rs-8875960/v1), 2026-02-20
Supplement: Supplementary file 2 [file 8acbfab9c984c4abff41d1d0.docx]

Supplementary **Information**

**Formability Improvement Mechanism of Local Laser Hardened Aluminium Alloy Sheet with Gradient Material Model**

Xiao-song Zhang1,2, Shuai-feng Chen1,*, Hong-wu Song 1,*, Xue-Jian Yang1,Wen-long Xie1, Bao-cheng Yang1, Shi-hong Zhang1, Zuo-shan Wei 3,4, Dorel Banabic5

1 Institute of Metal Research, Chinese Academy of Sciences, Shenyang 110016, China

2 School of Materials Science and Engineering, University of Science and Technology of China,

Shenyang 110016, China

3 Binzhou Institute of Technology, Weiqiao-UCAS Science and Technology Park, Binzhou 256606, China

4 Shandong Key Laboratory of Advanced Aluminium Materials and Technology, Weiqiao-UCAS Science and Technology Park, Binzhou 256606, China

5Department of Manufacturing Engineering, Technical University of Cluj-Napoca, Cluj-Napoca 400641, Romania

- 1. **Optimization of multi-layer gradient material model**

Mesh generation is an important factor affecting the calculation results for the material model, but a mesh that is too small will greatly increase the amount of calculation required. Therefore, this study proposes to adjust the minimum layered unit size *∆R* based on the precision factor *c*, as follow:

(S1)

where *Rring* and *rring* are the maximum and minimum radii of the ring difference region, respectively. *LNmax* is the Maximum gradient layer number. In this study, the product of *c* and *LNmax* is a fixed value of 72, that is, *c* is 1, 2, 3, 6 and 12, and *LNmax* is 72, 36, 24, 12 and 6, respectively.

In addition, this work proposes the maximum strength deviation parameter *ρm* and the maximum strength gradient parameter *fm* to evaluate the accuracy of the material mode, as follow:

(S2)

(S3)

where is the tensile strength of a unit with number *n*, is the average tensile strength of the calculation unit group. *ρm* is the maximum deviation between the average tensile strength and the continuous fitting strength function value in all calculation unit groups under the condition determined by *c*, and *fm* is the maximum deviation between the adjacent two calculation groups. They represent the fidelity and smoothness under a certain *c*, respectively. The calculated layering and simulating results under different precision factors are shown in Fig. S1. The results show that when Δ*R* exceeds 1.5mm, the simulation results of the differential plate blank model in deformation will be distorted. This is due to the large difference between the virtual material constitutive relationship of the model and the actual blank, that is, *ρm* is too large. The distortion caused by *fm* is reflected in the abrupt change of the equivalent strain cliff at the position where the gradient of the sample is larger, such as the position indicated by the arrow in the figure. This phenomenon appeared in *c* is 3,6 and 12 groups, and became more and more obvious with the increase of *c*. In summary, an increase in the number of gradient layers is associated with enhanced model fidelity and smoothness, leading to more precise simulation outcomes. Consequently, the control thresholds of *ρm* and *fm* are set at 0.1 in the subsequent simulation process of differential plate blanks.


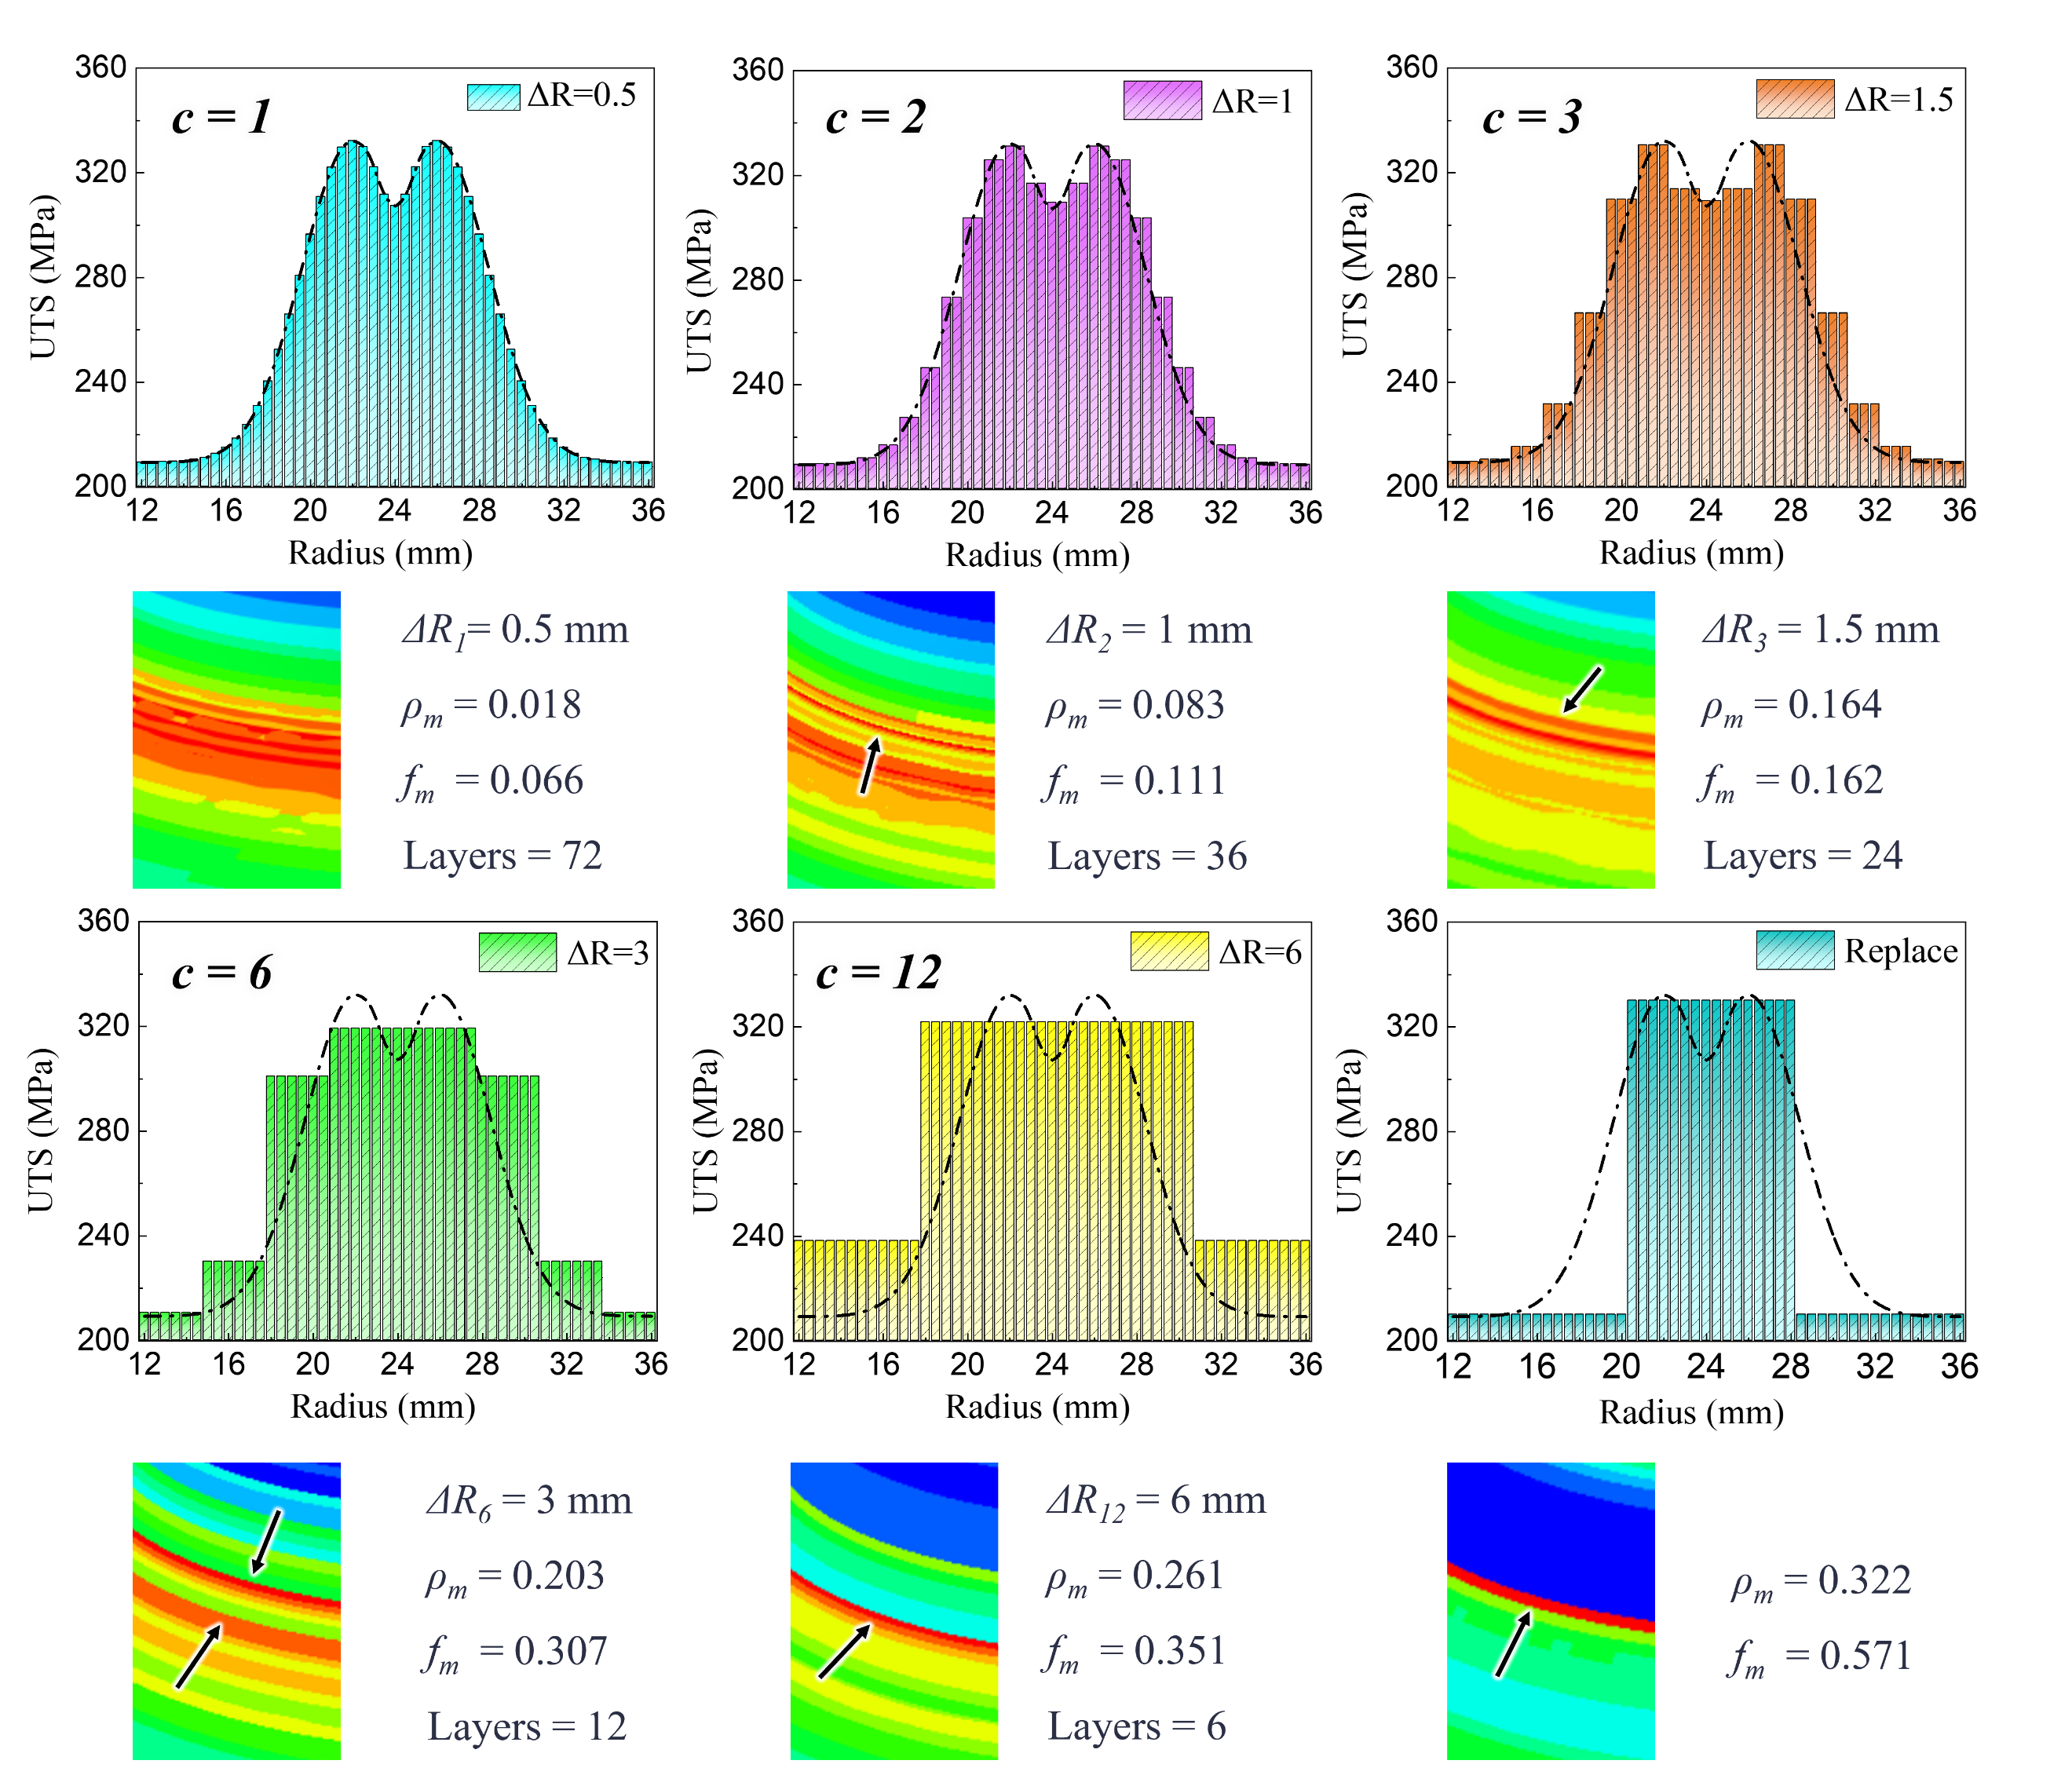


**Fig. S1** Calculated layering and simulating results under different precision factors

- 1. **FLC prediction with M-K theory**

The traditional M-K model was proposed by Marciniak and Kuczynski [52]. This model is based on the existence of imperfection that is modelled by the reduction of thickness in a part of the sheet. The safe region, im-perfection region and initial ratio of the groove thickness to the safe zone thickness are denoted by region A, region B and the ratio of thickness of the two regions *f0*, respectively, as shown in Fig. S2.


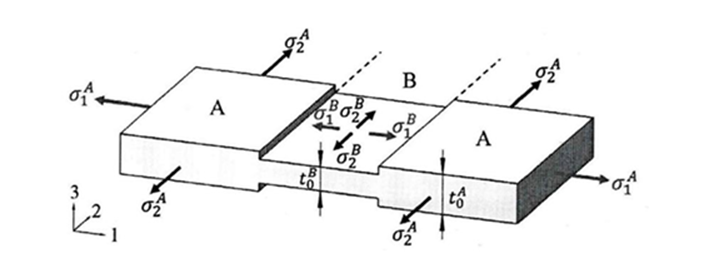


**Fig. S2** Schematic of M-K model

The model can be established according to the assumption of several basic conditions: (1) The sub-strain increment of A and B zone is equal. (2) Force balance condition (3) Constant volume principle.

According to the set initial uneven thickness of sheet metal:

(S4)

Considering anisotropy, the Hill48 yield criterion was adopted, but it is assumed that the sheet was still isotropic, that is, the thickness anisotropy coefficient *R* = *H/G* = *H/F*.

(S5)

According to the Levy-Mises increment principle, the strain increment and stress deviator can be expressed as:

(S6)

According to the constant volume principle, the stress component value *dε3A* in region A can be obtained, and then according to the condition of strain coordination and force balance, there is:

(S7)

(S8)

Swift constitutive model as formula (6) can be put into formula (S7). Newton-Raphson iterative method was adopted, and MATLAB programming was used to calculate. Under the plane stress state *dε2B* was 0, which leads to groove deepening. when *dε1B* > *dε1A*, the sheet will crack at the groove, then the ultimate strain can be obtained. Thus, the theoretical FLC can be obtained. That is, the forming limit of the material under different LHT temperatures can be predicted.

- 1. **Fitting results**

The Swift relationship is used to fit the true stress-strain curves of the material under different laser heat treatment peak temperatures, as shown in Fig. S3.


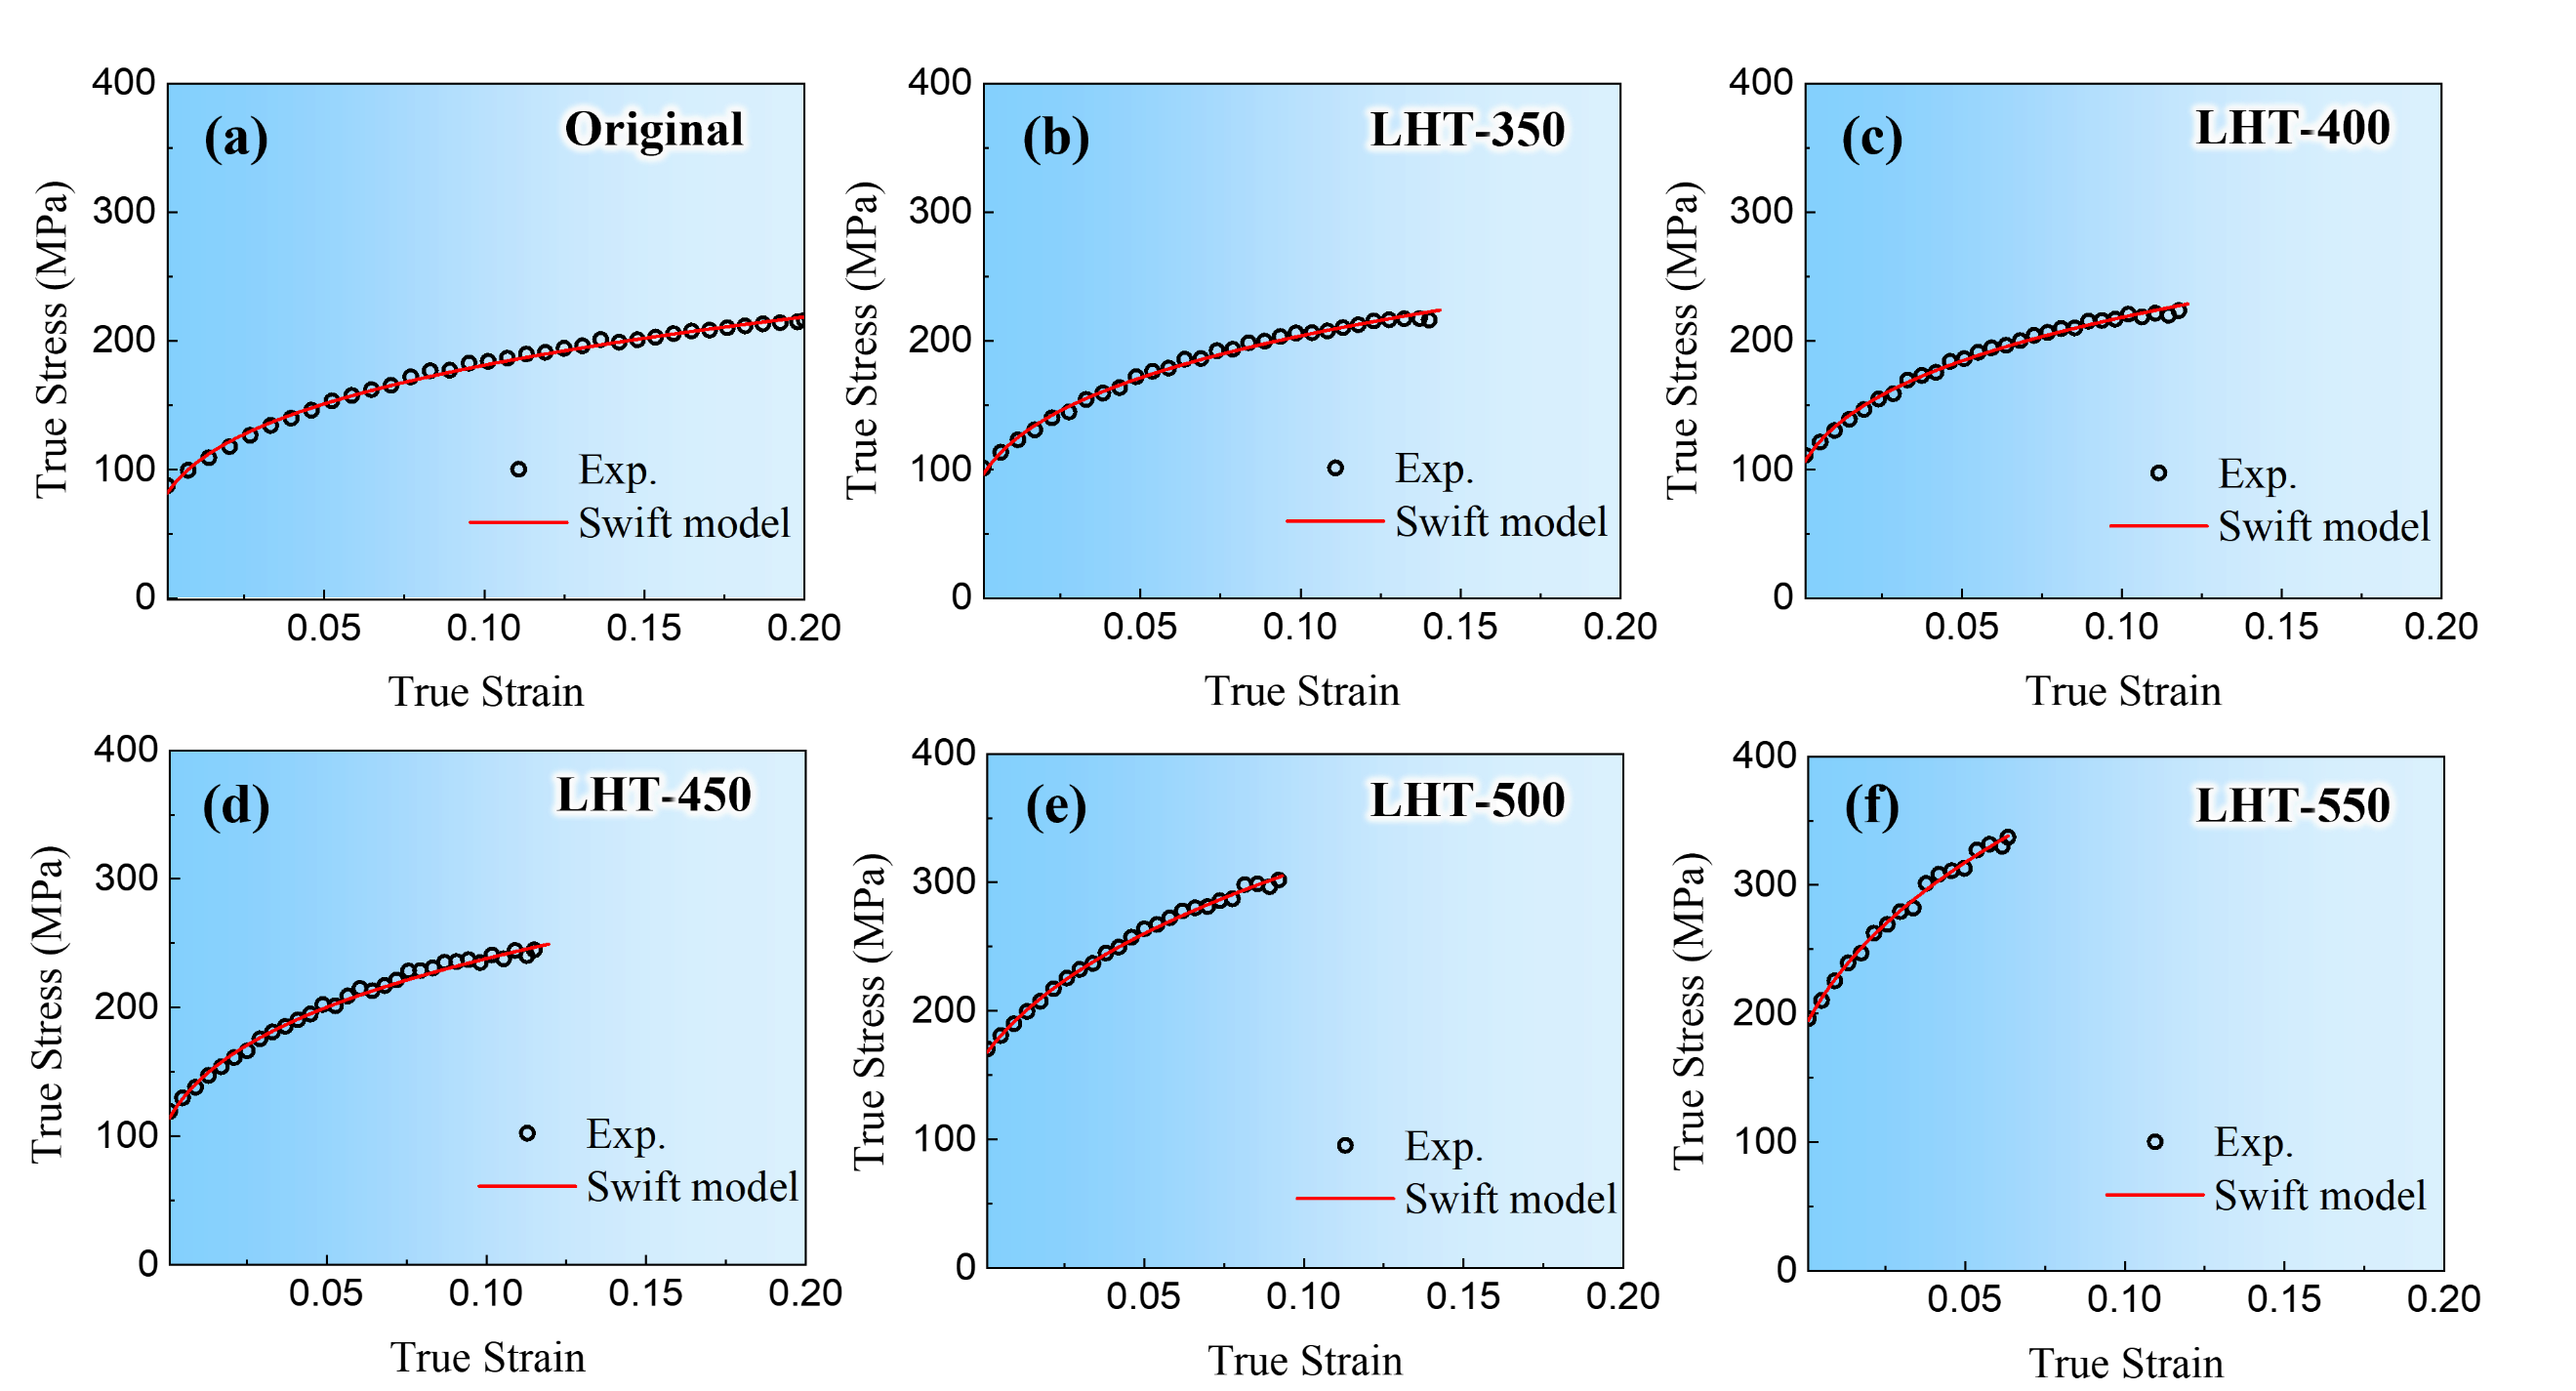


**Fig. S3** Fitting results of plastic section of mechanical properties curve under different laser heat treatment conditions
