# Supplementary figures and images for: Formability Improvement Mechanism of Local Laser Hardened Aluminium Alloy Sheet with Gradient Material Model
Source: Research Square preprint supplement (doi:10.21203/rs.3.rs-8875960/v1), 2026-02-20

**Graphical Abstract**


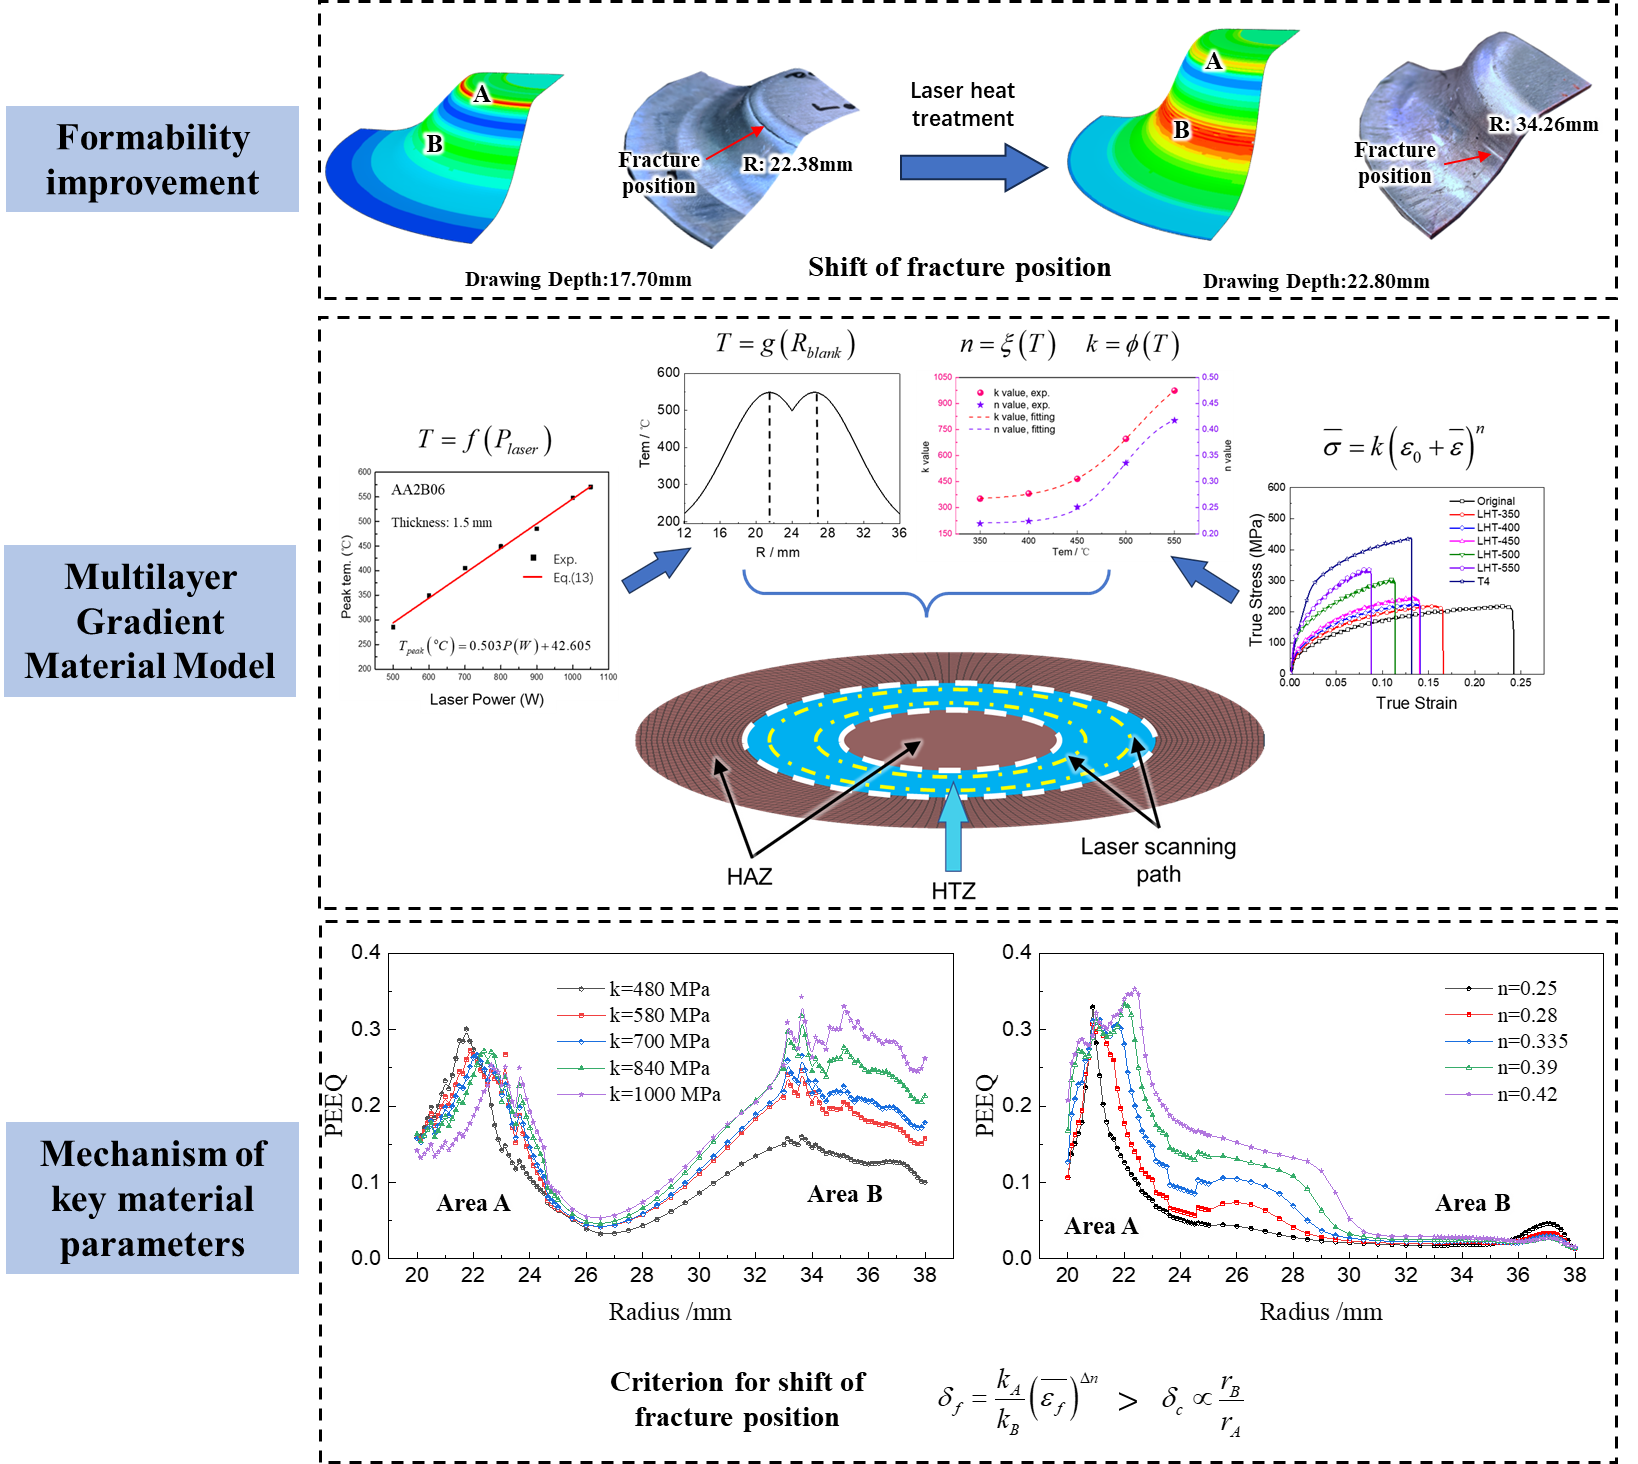

Supplement: Supplementary file 3 [file a6d6e695dacce94f2be85558.docx]
